# Supplementary material for: Efficient Generation of P53 Biallelic Mutations in Diannan Miniature Pigs Using RNA-Guided Base Editing
Source: MDPI journal article supplement (doi:10.3390/life11121417), 2021-12-17
Supplement: s1 [file s1]

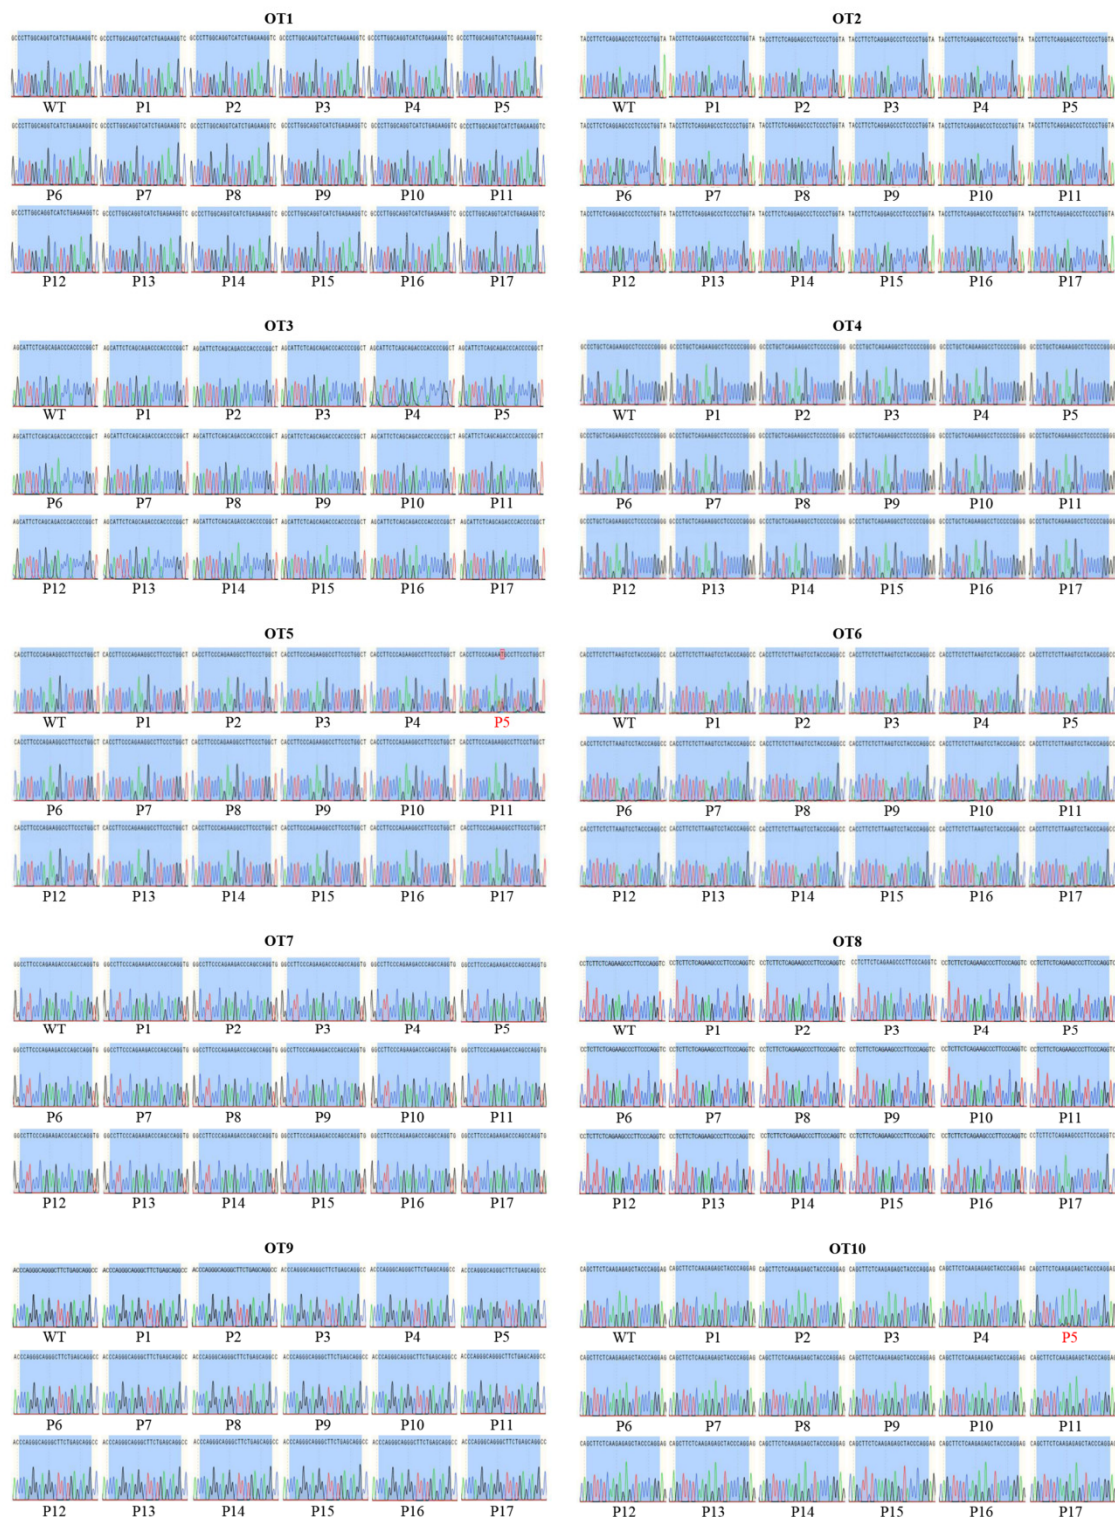

**Figure S1.** Off-target detection in piglets. Chromatogram sequence analysis of ten POTS for sgRNA using PCR products in P53. Red box labeled base indicates mutation. The piglets with off-target was shown in red. WT wild-type.

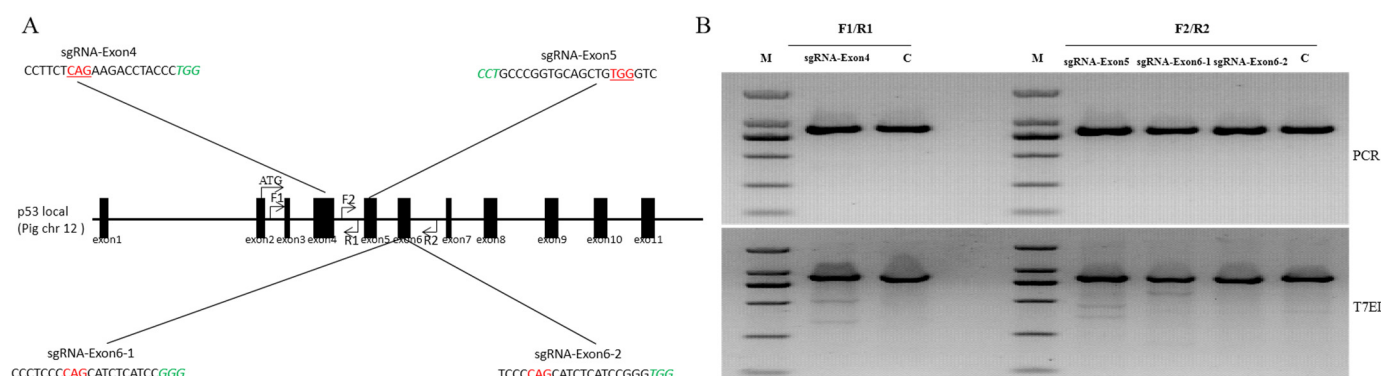

**Figure S2.** The information of sgRNAs design and the editing activity detected. (A) Schematic diagram of the target site at the P53 locus. sgRNA sequences are presented in black. PAM sequences are highlighted in green. The BE3-mediated nucleotide substitutions are marked in red and underlined. (B) Detection of sgRNA-Exon4, sgRNA-Exon5, sgRNA-Exon6-1 and sgRNA-Exon6-2: BE3-mediated base editing of P53 by PCR and T7EN1 cleavage assay. M, DNA marker; sgRNA-Exon4, P53sgRNA-Exon4; sgRNA-Exon5, P53sgRNA-Exon5; sgRNA-Exon6-1, P53sgRNA-Exon6-1; sgRNA-Exon6-2, P53sgRNA-Exon6-2; C, control.

**Table S1.** The primers of potential off-target sites (POTS).

| NO.  | Target                                                         | Position                 | Mismatches | Primer sequence                                         |
|------|----------------------------------------------------------------|--------------------------|------------|---------------------------------------------------------|
| OT1  | crRNA: CCTTCTCAGAAGACCTACCCNGG<br>DNA: CCTTCTCAGATGACCTGCCAAGG | chr1:191778281-191778303 | 3          | F: GCTACAAGGAGCGTTAACTCAG<br>R: AGTTCATAATGTAGAACGCCAGT |
| OT2  | crRNA: CCTTCTCAGAAGACCTACCCNGG<br>DNA: CCTTCTCAGGAGCCCTCCCCTGG | chr1:195746835-195746857 | 3          | F: AAACACCTGCTATCTAAGCTG<br>R: CCCGAATACTCATGGTTGC      |
| OT3  | crRNA: CCTTCTCAGAAGACCTACCCNGG<br>DNA: CATTCTCAGCAGACCCACCCCGG | chr14:5758517-5758539    | 3          | F: GCCCTCTCTGAATGAGTCTCGT<br>R: CCACCATCGGGAAAATACCACT  |
| OT4  | crRNA: CCTTCTCAGAAGACCTACCCNGG<br>DNA: CCTGCTCAGAAGGCCTCCCCCGG | chr4:2993758-2993780     | 3          | F: GTCCGTGGTCACCACTGGTC<br>R: GCCACCTAAGTCTCACTGTTGC    |
| OT5  | crRNA: CCTTCTCAGAAGACCTACCCNGG<br>DNA: CCTTCCCAGAAGGCCTTCCCTGG | chr7:38386638-38386660   | 3          | F: GCCCTATAAAGAGTTTAGCAT<br>R: TCTGTACCTCTACATCCCC      |
| OT6  | crRNA: CCTTCTCAGAAGACCTACCCNGG<br>DNA: CCTTCTCTTAAGTCTACCCAGG  | chr7:43009897-43009919   | 3          | F: TATATCCAGAGCCAACTAGTCA<br>R: TAGGCCAGTCAATAACAGT     |
| OT7  | crRNA: CCTTCTCAGAAGACCTACCCNGG<br>DNA: CCTTCCCAGAAGACCCAGCCAGG | chr10:53780587-53780609  | 3          | F: TGCACATCCTTTGTCAACTCA<br>R: TGCCTTTTCTTCCCTATGCTT    |
| OT8  | crRNA: CCTTCTCAGAAGACCTACCCNGG<br>DNA: TCTTCTCAGAAGCCCTTCCCAGG | chr11:74692873-74692895  | 3          | F: GCTGCACATTTTCATCATCCC<br>R: GGCCAGTAAACAAACATCACC    |
| OT9  | crRNA: CCTTCTCAGAAGACCTACCCNGG<br>DNA: CCTGCTCAGAAGCCCTGCCCTGG | chr17:39846377-39846399  | 3          | F: CCCAGCACCTTTATACTCAC<br>R: GTGCAGTCAACAAAACACCATC    |
| OT10 | crRNA: CCTTCTCAGAAGACCTACCCNGG<br>DNA: GCTTCTCAAGAGAGCTACCCAGG | chr9:58847217-58847239   | 4          | F: TGGCATTTTCTCTGAACCAT<br>R: CCACCTAAGCCAGATGTTCC      |
